# Supplementary material
Source: Elsevier journal article supplement (https://www.sciencedirect.com/science/article/pii/S021265672030336X)
Supplement: mmc1 [file S021265672030336X:mmc1.pdf]

## CUESTIONARIO DE ACTIVIDAD FÍSICA PAS-2.1S

Folio \_\_\_\_\_

Las siguientes preguntas son sobre la actividad física que usted hace en su casa, sitio de trabajo o escuela y en su tiempo libre. Incluye no solamente deporte y ejercicio, sino la actividad e inactividad que usted lleva a cabo en su vida diaria. Coloque las horas o minutos en los espacios. Si no aparece la actividad exacta que usted realiza, trate de elegir la que más se parece a la que usted lleva a cabo.

Edad: \_\_\_\_\_ 1: Hombre \_\_\_\_\_ 2: Mujer \_\_\_\_\_ Estudia: 1. Sí \_\_\_\_\_ 2. No \_\_\_\_\_ Trabaja: 1. Sí \_\_\_\_\_ 2. No \_\_\_\_\_

Ocupación \_\_\_\_\_ Hasta qué grado estudió \_\_\_\_\_ Fecha \_\_\_\_\_

## ACTIVIDADES DIARIAS

En esta sección trate de poner en el espacio de la derecha las horas o minutos en que realiza las actividades mencionadas en un día ordinario, trate de no dejar espacios vacíos y no pasarse de 24 horas, si no realiza nada, ponga ceros

|                                                                                                                                                                                                                                                              |                                                                                                                                                                                                       |                |                  |
|--------------------------------------------------------------------------------------------------------------------------------------------------------------------------------------------------------------------------------------------------------------|-------------------------------------------------------------------------------------------------------------------------------------------------------------------------------------------------------|----------------|------------------|
|                                                                                                                                                                             | 1. ¿Cuántas horas duerme <b>diariamente</b> en promedio?<br>(Incluya las siestas durante el día)                                                                                                      | _____<br>Horas | _____<br>Minutos |
| <br><br> | En su Trabajo o Escuela ¿cuántas horas o minutos realiza <b>comúnmente al día</b> las siguientes actividades? (incluye trabajo en casa)                                                               |                |                  |
|                                                                                                                                                                                                                                                              | 2. Estar sentado                                                                                                                                                                                      | _____<br>Horas | _____<br>Minutos |
|                                                                                                                                                                                                                                                              | 3. Estar parado o caminando                                                                                                                                                                           | _____<br>Horas | _____<br>Minutos |
|                                                                                                                                                                                                                                                              | 4. Levantar cosas pesadas o subir escaleras                                                                                                                                                           | _____<br>Horas | _____<br>Minutos |
|                                                                                                                                                                            | 5. ¿Cuántas horas y minutos <b>al día</b> pasa sentado <b>comúnmente</b> (en su auto o transporte público) para trasladarse de su casa al trabajo/escuela y del trabajo/escuela a su casa?            | _____<br>Horas | _____<br>Minutos |
|                                                                                                                                                                           | 6. En su <b>tiempo libre</b> ¿Cuántas horas y minutos <b>diarios</b> <b>comúnmente</b> pasa sentado(a) frente a una pantalla (televisión, computadora, celular, tablet, videojuegos, etc.) o leyendo? | _____<br>Horas | _____<br>Minutos |

## ACTIVIDADES A LA SEMANA DEDICADAS AL EJERCICIO

En esta sección se le pide que reporte el tiempo en horas y minutos por semana dedicados a realizar EJERCICIO, si no realiza nada, ponga ceros por favor

|                                                                                     |                                                                                                                                                                                                                                                                                               |                |                  |
|-------------------------------------------------------------------------------------|-----------------------------------------------------------------------------------------------------------------------------------------------------------------------------------------------------------------------------------------------------------------------------------------------|----------------|------------------|
|  | 7. <b>Actividad Física ligera:</b> En su tiempo libre, ¿Cuántas horas y minutos a la semana, comúnmente realiza actividad física ligera, como caminar?<br>(Ejemplo: media hora de lunes a viernes, sería igual a 2 horas y 30 minutos)                                                        | _____<br>Horas | _____<br>Minutos |
|  | 8. <b>Actividad Física Moderada:</b> En su tiempo libre, ¿cuántas horas y minutos a la semana, comúnmente realiza deportes como andar en bicicleta, trotar o actividades similares?<br>(Ejemplo: media hora de lunes a viernes, sería igual a 2 horas y 30 minutos)                           | _____<br>Horas | _____<br>Minutos |
|  | 9. <b>Actividad Física Vigorosa:</b> En su tiempo libre, ¿cuántas horas y minutos a la semana, comúnmente dedica a hacer deportes extenuantes como aerobics, correr rápido, jugar fútbol, tenis, nadar, etc.?<br>(Ejemplo: media hora de lunes a viernes, sería igual a 2 horas y 30 minutos) | _____<br>Horas | _____<br>Minutos |

## Guía para la aplicación del cuestionario Physical Activity Scale 2.1 Spanish (PAS-2.1S)

El propósito de este cuestionario es ofrecer un instrumento que pueda utilizarse para obtener datos sobre la actividad física llevada a cabo por cada persona, comprende un conjunto de 4 dominios de actividad explorados de manera independiente (actividad física vigorosa, moderada, ligera y comportamiento sedentario).

### Instrucciones

1. El aplicador deberá enfatizar al encuestado leer bien las instrucciones antes de contestar.
2. Hacer énfasis en que el cuestionario divide la primera sección en horas al día y la segunda sección en horas por semana.
3. Se deberá comentar al encuestado que no debe reportar más de 24 horas en las actividades "DIARIAS"

Para realizar el cálculo de la cantidad de METs empleados, se utilizarán los mismos criterios de la escala PAS-2.1 original, los cuales están basados en el Compendium of Physical Activities.\*

\*Ainsworth BE, Haskell WL, Whitt MC, Irwin ML, Swartz AM, Strath SJ, et al. Compendium of Physical Activities: an update of activity codes and MET intensities. *Medicine & Science in Sports & Exercise*. 2000;32 (9S):S498-S516.

1. **Dormir:** multiplicar el número de horas reportadas por 0.9
2. **Sentado en el trabajo/escuela:** multiplicar el número de horas reportadas por 1.5
3. **Caminando o de pie en el trabajo/escuela:** multiplicar el número de horas reportadas por 2
4. **Levantando cosas pesadas o subiendo escaleras en el trabajo/escuela:** multiplicar el número de horas reportadas por 5
5. **Sentado para transportarse de su casa al trabajo/escuela:** multiplicar el número de horas reportadas por 1.5
6. **Tiempo de ocio sentado diario:** multiplicar el número de horas reportadas por 1
7. **Ejercicio Ligero Semanal:** multiplicar el número de horas reportadas por 3
8. **Ejercicio Moderado Semanal:** multiplicar el número de horas reportadas por 5
9. **Ejercicio Vigoroso Semanal:** multiplicar el número de horas reportadas por 6

Para calcular el total de METs por semana, cada una de las actividades diarias destinadas al trabajo y transporte deberán ser multiplicadas por 5 (días) y por 7 (días) las de dormir y tiempo libre de ocio. En caso de que la persona haya reportado menos de 24 horas de actividades diarias, las horas faltantes, deberán ser multiplicadas por 2. Finalmente, se deberán sumar los METs calculados de las actividades semanales.
